# Supplementary material for: Developing Normative Integration among Professionals in an Intersectoral Collaboration: A Multi-Method Investigation of an Integrated Intervention for People on Sick Leave Due to Common Mental Disorders
Source: PubMed Central journal article supplement (PMC6838772; doi:10.5334/ijic.4694), 2019-11-04
Supplement: ijic-19-4-4694-s1.pdf [file ijic-19-4-4694-s1.pdf]

*Appendix 1: Overview of involved informants, observations and interview*

| <b>IBBIS participant</b> | <b>Participant gender</b> | <b>Participant sick leave cause</b> | <b>Observation of roundtable meeting</b> | <b>Care manager interview date</b> | <b>Position in IBBIS</b> | <b>Employment consultant interview date</b> | <b>Position in IBBIS</b> | <b>Team</b>    |
|--------------------------|---------------------------|-------------------------------------|------------------------------------------|------------------------------------|--------------------------|---------------------------------------------|--------------------------|----------------|
| <b>P 1</b>               | Male                      | Stress                              | 20-04-2017                               | CM 1: 05-05-2017                   | Full time                | EC 1: 28-04-2017                            | Full time                | The small team |
| <b>P 2</b>               | Male                      | Anxiety                             | 02-05-2017                               | CM 2: 04-05-2017                   | Full time                | EC 2: 09-05-2017                            | 50 %                     | The large team |
| <b>P 3</b>               | Woman                     | Depression                          | 08-05-2017                               | CM 3: 10-05-2017                   | Full time                | EC 3: 08-05-2017                            | 50 %                     | The large team |
| <b>P 4</b>               | Woman                     | Depression                          | 15-05-2017                               | CM 2: 23-05-2017                   | Full time                | EC 4: 23-05-2017                            | 50 %                     | The large team |
| <b>P 5</b>               | Woman                     | Depression                          | 16-05-2017                               | CM 3: 31-05-2017                   | Full time                | EC 3: 22-05-2017                            | 50 %                     | The large team |
| <b>P 6</b>               | Woman                     | Stress                              | 24-05-2017                               | CM 4: 01-06-2017                   | Full time                | EC 5: 24-05-2017                            | 50 %                     | The large team |
| <b>P 7</b>               | Male                      | Stress                              | 24-10-2017                               | CM 5: 24-10-2017                   | CM/team leader           | EC 6: 01-11-2017                            | Full time                | The small team |
| <b>P 8</b>               | Male                      | Stress                              | 31-10-2017                               | CM 6: 08-11-2017                   | Full time                | EC 7: 08-11-2017                            | Full time                | The small team |
| <b>P 9</b>               | Woman                     | Stress                              | 16-11-2017                               | CM 7: 16-11-2017                   | Full time                | EC 6: 30-11-2017                            | Full time                | The small team |
| <b>P 10</b>              | Woman                     | Stress                              | 22-11-2017                               | CM 8: 24-11-2017                   | Full time                | EC 8: 29-11-2017                            | 50 %                     | The large team |
| <b>P 11</b>              | Male                      | Stress                              | 30-11-2017                               | CM 5: 05-12-2017                   | Full time                | EC 7: 05-12-2017                            | Full time                | The small team |
| <b>P 12</b>              | Woman                     | Stress                              | 11-01-2018                               | CM1: 11-01-2018                    | Full time                | EC 1: 17-01-2018                            | Full time                | The small team |

*Table 1: Observations and interviews evolving around 12 IBBIs participants, and informant characteristics*

*Table 2: Initial and follow-up interviews with the supervisor team*

| <b>Supervisor interview</b>      | <b>Initial interview</b> | <b>Follow-up interview</b> |
|----------------------------------|--------------------------|----------------------------|
| <b>Supervisor/team leader 1:</b> | 04.09.2017               | 13.07.2018                 |
| <b>Supervisor/team leader 2:</b> | 01.07.2017               | 02.07.2018                 |
| <b>Supervisor/team leader 3</b>  | 30.08.2017               |                            |
| <b>Supervisor/team leader 3</b>  |                          | 11.07.2018                 |
